# Supplementary material for: CTNNB1/β-catenin dysfunction contributes to adiposity by regulating the cross-talk of mature adipocytes and preadipocytes
Source: PubMed Central journal article supplement — Sci Adv. 2020 Jan 8;6(2):eaax9605. doi: 10.1126/sciadv.aax9605 (PMC6949042; doi:10.1126/sciadv.aax9605), 2020-01-08
Supplement: aax9605_SM.pdf [file aax9605_SM.pdf]

## Supplementary Materials for

### ***CTNNB1*/β-catenin dysfunction contributes to adiposity by regulating the cross-talk of mature adipocytes and preadipocytes**

Maopei Chen, Peng Lu, Qinyun Ma, Yanan Cao, Na Chen, Wen Li, Shaoqian Zhao, Banru Chen, Juan Shi, Yingkai Sun, Hongbin Shen, Liangdan Sun, Juan Shen, Qijun Liao, Yifei Zhang, Jie Hong, Weiqiong Gu, Ruixin Liu\*, Guang Ning\*, Weiqing Wang\*, Jiqui Wang\*

\*Corresponding author. Email: xiner198287@163.com (R.L.); gning@sibs.ac.cn (G.N.); wqingw61@163.com (W.W.); wangjq@shsmu.edu (J.W.)

Published 8 January 2020, *Sci. Adv.* **6**, eaax9605 (2020)  
DOI: 10.1126/sciadv.aax9605

#### **This PDF file includes:**

Fig. S1. Common noncoding variants in and around *CTNNB1* show significant association signals with BMI in GIANT UK Biobank study.

Fig. S2. Genetic mutations in the *CTNNB1* gene in young obese and control subjects.

Fig. S3. Phenotypes of APBKO mice.

Fig. S4. Metabolic parameters in ABKO mice fed normal chow diet at young and old ages.

Fig. S5. Food intake, fecal calorie excretion, and energy expenditure in ABKO mice fed HFD.

Fig. S6. The expression changes of genes involved in adipogenesis and the percentage changes of progenitors in adipose tissues of ABKO mice fed HFD.

Fig. S7. Cell viability of Saa3-treated preadipocytes and the expression of secreted factors in Saa3-treated macrophages.

Table S1. The BMI association signals of common variants in and around *CTNNB1* from GIANT UK Biobank GWAS.

Table S2. Rare missense variants in the *CTNNB1* gene in young, severely obese cases and controls.

Table S3. The clinical parameters related to obesity in gain-of-function *CTNNB1* carriers.

References (47, 48)

## Supplementary Materials

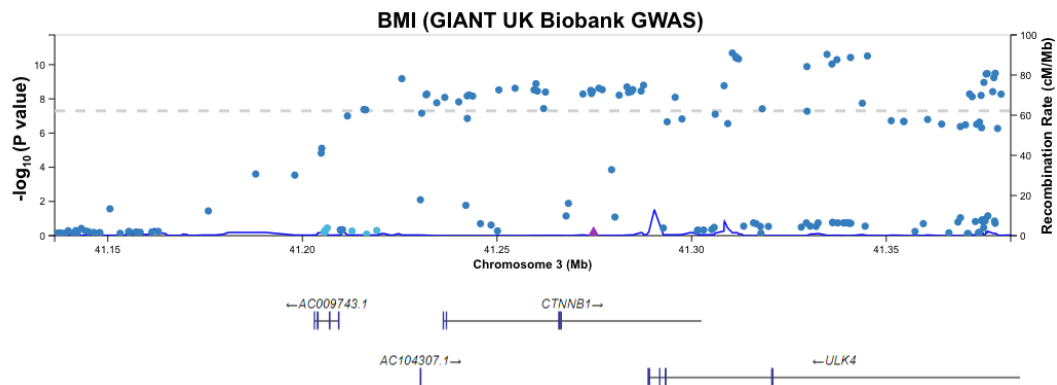

**Fig. S1. Common noncoding variants in and around *CTNNB1* show significant association signals with BMI in GIANT UK Biobank study (25).** This region plot of BMI around *CTNNB1* gene came from Type 2 Diabetes Knowledge Portal (T2D Portal) (*CTNNB1*. type2diabetesgenetics.org, 2019 Aug 15; <http://www.type2diabetesgenetics.org/gene/geneInfo/CTNNB1>).<http://www.type2diabetesgenetics.org/>).

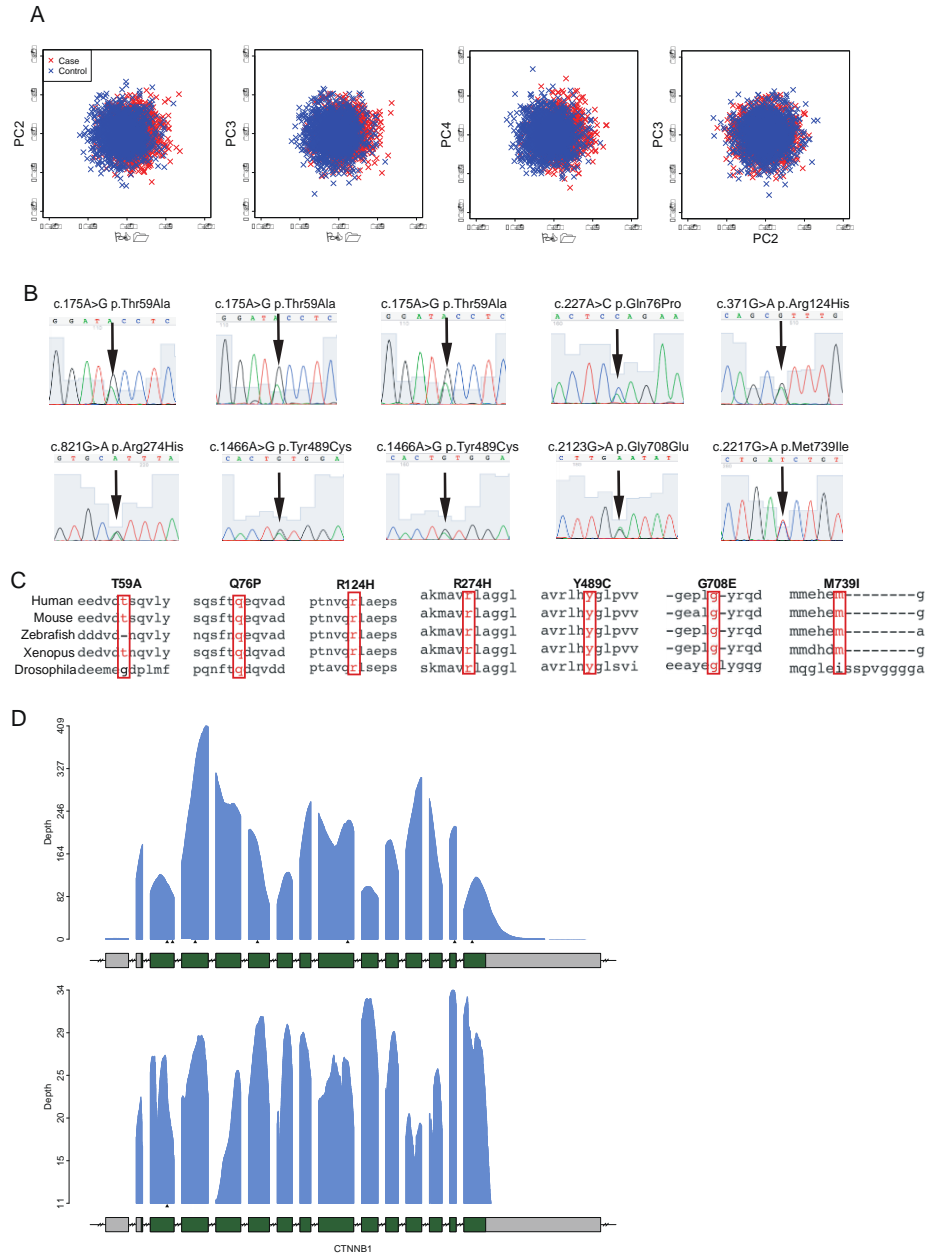

**Fig. S2. Genetic mutations in the *CTNNB1* gene in young obese and control subjects.** (A), Principal component analysis for 1,408 young, severely obese cases and 1,455 non-obese controls. The principal components were calculated based on 18,631 SNPs retained after linkage disequilibrium pruning. Plots of the first and the second to fourth principal components were drawn. (B), Sanger sequencing of the indicated mutations. Arrows indicated mutation sites. (C), Sequence conservation of the indicated mutation sites in *CTNNB1* among different species. (D), Schematic representation of *CTNNB1* protein with mutations in obese group (the upper) and control group (the lower). Black triangle indicated the location of mutation sites.

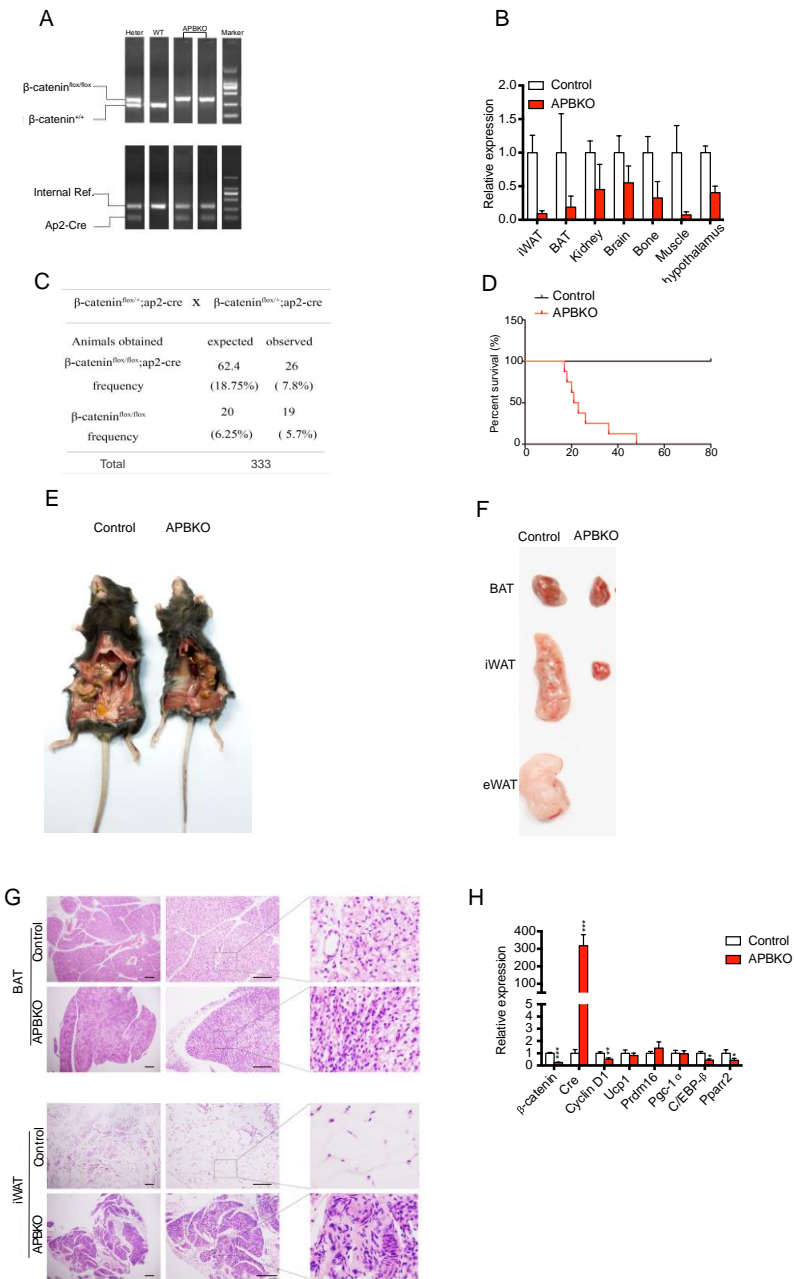

**Fig. S3. Phenotypes of APBKO mice.** (A), Genotyping of wild-type, heterozygous  $\beta$ -catenin<sup>flox/flox</sup> (control) mice and  $\beta$ -catenin<sup>flox/flox</sup>;ap2-Cre (APBKO) mice. (B),  $\beta$ -catenin expression in the indicated tissues. (C-D), Birth rate (C) and survival curve (D) for control and APBKO mice. (E-G), Representative gross images of mice (E), dissected BAT, iWAT and eWAT (F), and H&E staining of BAT and iWAT (G) from male control and APBKO mice aged 8 weeks. Left panel, 100 $\times$  magnification; middle panel, 200 $\times$  magnification. Scale bar, 100  $\mu$ m. (H), Gene expression involved in thermogenesis in BAT from male control and APBKO mice. Control,  $\beta$ -catenin<sup>flox/flox</sup> mice; APBKO,  $\beta$ -catenin<sup>flox/flox</sup>;ap2-Cre mice. iWAT, inguinal white adipose tissue; eWAT, epididymal white adipose tissue; BAT, brown adipose tissue. Data are shown

as mean  $\pm$  SEM. \*  $P < 0.05$ , \*\*  $P < 0.01$ , \*\*\*  $P < 0.001$ .

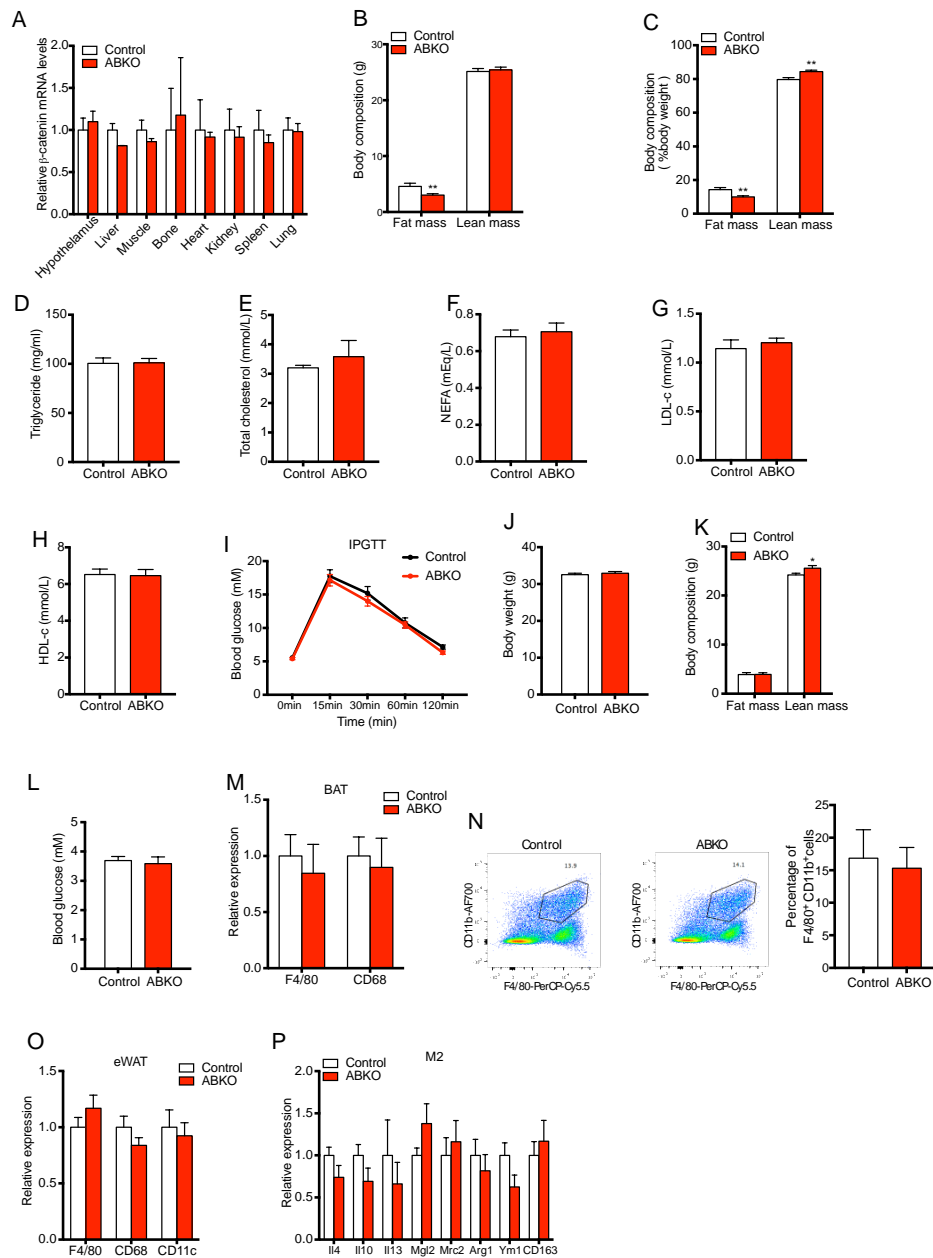

**Fig. S4. Metabolic parameters in ABKO mice fed normal chow diet at young and old ages.** (A), Relative  $\beta$ -catenin mRNA levels in non-fat tissues between control and ABKO mice fed chow diet ( $n=3$  for each group). (B-C), Body composition (B) and the percentage of body composition to body weight (C) in control and ABKO mice fed chow diet at 26 weeks old ( $n=7$  for control mice,  $n=13$  for ABKO mice). (D-H), Serum triglyceride (D), total cholesterol (E), NEFA (F), LDL-c (G) and HDL-c (H) levels in control and ABKO mice at 26 weeks chow diet ( $n=7$  for control mice,  $n=13$  for ABKO mice). (I), Blood glucose levels during IPGTT in control and ABKO mice at 24 weeks chow diet ( $n=15$  for control mice,  $n=19$  for ABKO mice). (J-K), Body weight (J) and body composition (K) of control and ABKO mice at 18 months old in chow diet ( $n=8$  for each group). L, Blood glucose levels of control and ABKO mice

after 16 hours fasting at 18 months old in chow diet (n=8 for each group). **(M)**, Relative mRNA levels of macrophage markers in BAT in 26 weeks HFD-fed control and ABKO mice (n=13 for each group). **(N)**, Left, representative images of cell sorting of F4/80<sup>+</sup>CD11b<sup>+</sup> cells from eWAT SVF of 26 weeks HFD-fed control and ABKO mice by FACS; Right, quantification of the percentage of F4/80<sup>+</sup>CD11b<sup>+</sup> cells to CD45<sup>+</sup> cells in SVF of eWAT (n=4 for each group). **(O)**, Relative mRNA levels of macrophage markers in eWAT in 26 weeks HFD-fed control and ABKO mice (n=13 for each group). **(P)**, Relative mRNA levels of type II macrophage (M2) markers in iWAT of 26 weeks HFD-fed control and ABKO mice (n=6-13 for control mice, n=6-12 for ABKO mice). Control,  $\beta$ -catenin<sup>flox/flox</sup> mice; ABKO,  $\beta$ -catenin<sup>flox/flox</sup>; Adiponectin-Cre mice. eWAT, epididymal white adipose tissue; BAT, brown adipose tissue. HFD, high-fat diet. Data are shown as mean  $\pm$  SEM. \* P<0.05.

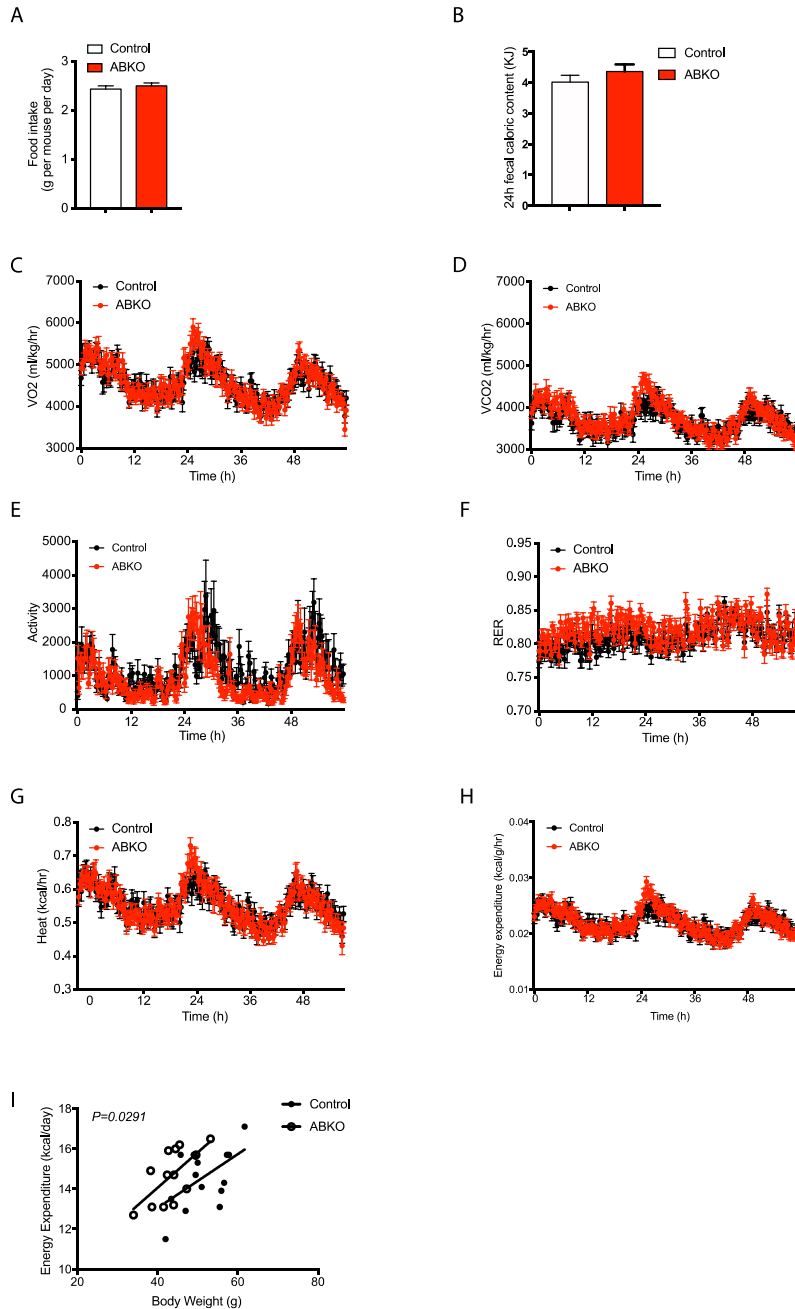

**Fig. S5. Food intake, fecal calorie excretion, and energy expenditure in ABKO mice fed HFD.** (A), 24h food intake in control and ABKO mice (n=20 for control mice, n=15 for ABKO mice). (B), 24h fecal caloric content of 30 weeks HFD-fed control and ABKO mice (n=10 for each group). (C-E), whole-body oxygen (O<sub>2</sub>) consumption (C), carbon dioxide (CO<sub>2</sub>) production (D), physical activity (E) from 26 weeks HFD-fed male control and ABKO mice during a 24-hour period (n=15 for control mice, n=13 for ABKO mice). (F-H), Respiratory exchange ratio (RER) (F), heat (G) and energy expenditure (H) is calculated for 26 weeks HFD-fed male control and ABKO mice (n=15 for control mice, n=13 for ABKO mice). (I), Energy expenditure was plotted in relation to body weight using ANCOVA. Control,  $\beta$ -catenin<sup>fl<sub>ox</sub>/fl<sub>ox</sub></sup> mice; ABKO,  $\beta$ -catenin<sup>fl<sub>ox</sub>/fl<sub>ox</sub></sup>; Adiponectin-Cre mice. HFD, high-fat diet. Data are shown as mean  $\pm$  SEM.

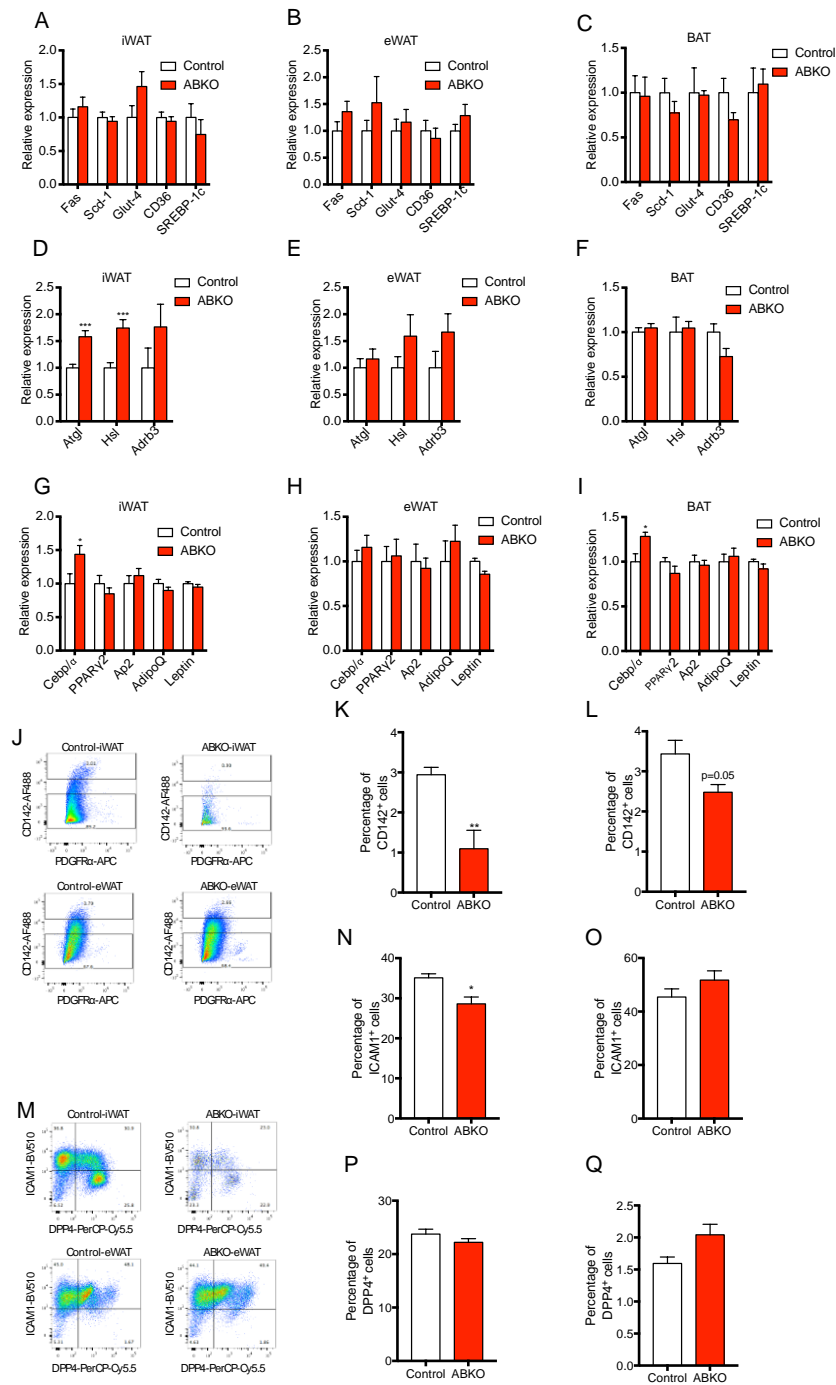

**Fig. S6. The expression changes of genes involved in adipogenesis and the percentage changes of progenitors in adipose tissues of ABKO mice fed HFD. (A-C), Relative mRNA levels of lipogenesis genes in iWATs (A), eWATs (B) and BATs (C) (n=6-13 for each group). (D-F), Relative mRNA levels of lipolysis genes in iWATs (D), eWATs (E) and BATs (F) (n=6-13 for each group). (G-I), Relative mRNA levels of adipogenesis genes in iWATs (G), eWATs (H) and BATs (I) (n=6-13 for each**



group). **(J)**, Representative images of cell sorting of Cd142<sup>+</sup> cells from iWAT and eWAT SVF of 26 weeks HFD-fed control and ABKO mice by FACS. **(K-L)**, quantification of the percentage of Cd142<sup>+</sup> cells in Cd45<sup>-</sup>Cd31<sup>-</sup> cells from SVF of iWAT and eWAT, respectively (n=4 for each group). **(M)**, Representative images of cell sorting of adipose precursor subpopulations from iWAT and eWAT SVF of 26 weeks HFD-fed control and ABKO mice by FACS. **(N-O)**, quantification of the percentage of Icam1<sup>+</sup> Dpp4<sup>-</sup> cells in Cd45<sup>-</sup>Cd31<sup>-</sup> Cd142<sup>-</sup> cells from SVF of iWAT (N) and eWAT (O), respectively (n=4 for each group). **(P-Q)**, quantification of the percentage of Dpp4<sup>+</sup>Icam1<sup>-</sup> cells in Cd45<sup>-</sup>Cd31<sup>-</sup> Cd142<sup>-</sup> cells from SVF of iWAT (P) and eWAT (Q), respectively (n=4 for each group). Control,  $\beta$ -catenin<sup>flox/flox</sup> mice; ABKO,  $\beta$ -catenin<sup>flox/flox</sup>; Adiponectin-Cre mice. iWAT, inguinal white adipose tissue; eWAT, epididymal white adipose tissue; BAT, brown adipose tissue. Data are shown as mean  $\pm$  SEM. \* P<0.05.

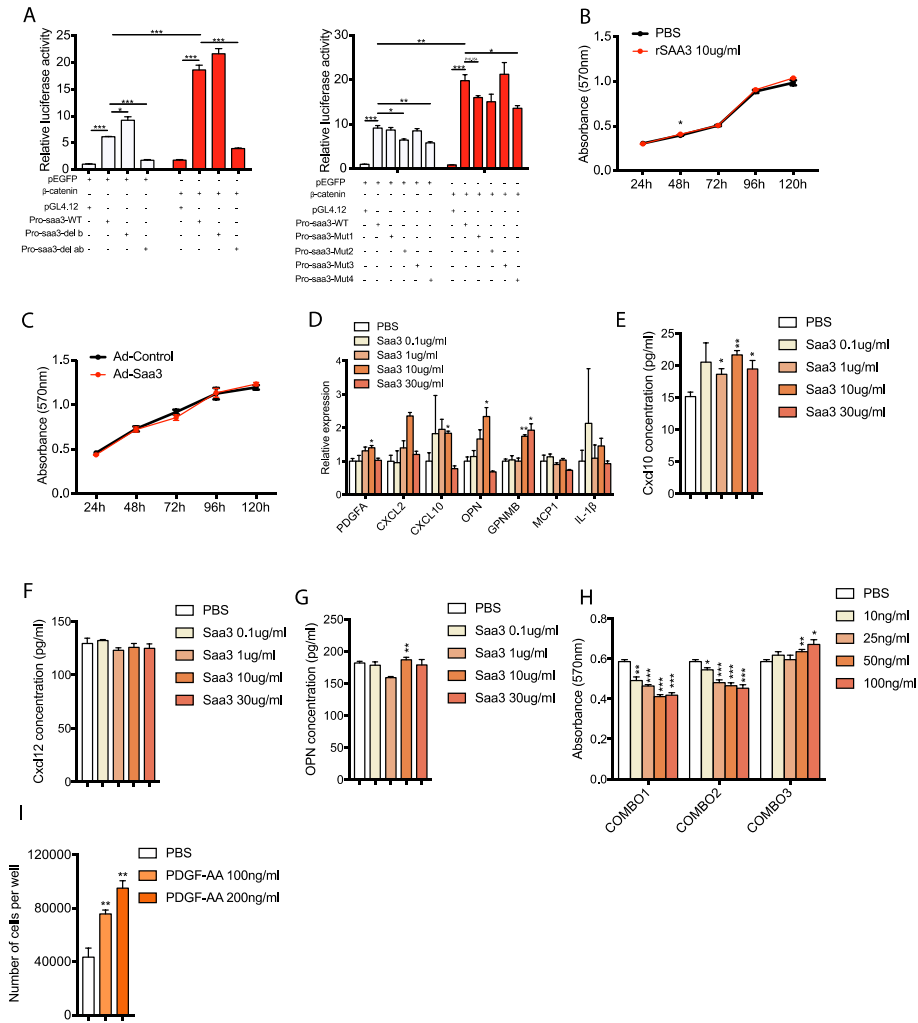

**Fig. S7. Cell viability of Saa3-treated preadipocytes and the expression of secreted factors in Saa3-treated macrophages.** (A), Luciferase reporter assay performed in 3T3-L1 cell line 48 hours after transfection with the indicated plasmids. Left, relative luciferase activity of *Saa3* deletion mutants with or without  $\beta$ -catenin; right, relative luciferase activity of *Saa3* point mutants with or without  $\beta$ -catenin. pRL-TK (expressing Renilla luciferase) was used as the normalized control. (B), Cell viability of 3T3-L1 cells treated with PBS or recombinant Saa3 (10  $\mu$ g/ml) during 120 hours. (C), Cell viability of SVFs infected with control adenovirus or *Saa3* overexpressing adenovirus during 120 hours. (D), Relative mRNA levels of inflammatory and growth factors expressed by Raw264.7 treated with the increasing doses of recombinant Saa3 protein. (E-G), Concentrations of Cxcl10 (E), Cxcl12 (F) and OPN (G) in the conditioned medium of Raw264.7 cells treated with the increasing doses of recombinant Saa3 protein. (H), Cell viability of 3T3-L1 preadipocytes treated with different combination formula consisting of the recombinant proteins for 120 hours. COMBO1 contained Il-1 $\beta$ , Il-6 and Mcp-1;

COMBO2 contained Ccl12, Cxcl2, Cxcl10 and Cxcl12; COMBO3 contained OPN, Gpmb and PDGF-AA. **(I)**, Cell number of 3T3-L1 preadipocytes treated with different concentrations of PDGF-AA recombinant protein for 120 hours. Data are shown as mean  $\pm$  SEM. \* P<0.05, \*\* P<0.01, \*\*\* P<0.001.

**Table S1. The BMI association signals of common variants in and around *CTNNB1* from GIANT UK Biobank GWAS.**

| Variants       | dbSNP              | Function           | Major allele | Minor allele | P-value  | Effect | Gene   |
|----------------|--------------------|--------------------|--------------|--------------|----------|--------|--------|
| 3_41310470_G_A | <i>rs9814633</i>   | intron             | G            | A            | 2.10E-11 | 0.0122 | ULK4   |
| 3_41334787_T_G | <i>rs17267020</i>  | intron             | T            | G            | 2.50E-11 | 0.012  | ULK4   |
| 3_41345172_C_T | <i>rs4118041</i>   | intron             | C            | T            | 3.10E-11 | 0.012  | ULK4   |
| 3_41311362_G_C | <i>rs9816029</i>   | intron             | G            | C            | 3.40E-11 | 0.012  | ULK4   |
| 3_41340824_A_G | <i>rs9852315</i>   | intron             | A            | G            | 3.80E-11 | 0.0119 | ULK4   |
| 3_41311387_G_A | <i>rs6793667</i>   | intron             | G            | A            | 4.00E-11 | 0.012  | ULK4   |
| 3_41312055_G_A | <i>rs9820765</i>   | intron             | G            | A            | 4.60E-11 | 0.0119 | ULK4   |
| 3_41337338_C_A | <i>rs11718282</i>  | intron             | C            | A            | 5.10E-11 | 0.0119 | ULK4   |
| 3_41336053_C_A | <i>rs11717079</i>  | intron             | C            | A            | 9.20E-11 | 0.0117 | ULK4   |
| 3_41329633_T_C | <i>rs9879363</i>   | intron             | T            | C            | 1.30E-10 | 0.0117 | ULK4   |
| 3_41378012_A_C | <i>rs9835228</i>   | intron             | A            | C            | 3.20E-10 | 0.0117 | ULK4   |
| 3_41375994_A_T | <i>rs1352272</i>   | intron             | A            | T            | 3.30E-10 | 0.0115 | ULK4   |
| 3_41375667_G_A | <i>rs6790569</i>   | intron             | G            | A            | 3.50E-10 | 0.0115 | ULK4   |
| 3_41377659_A_G | <i>rs6786286</i>   | intron             | A            | G            | 5.80E-10 | 0.0115 | ULK4   |
| 3_41225545_T_C | <i>rs4973925</i>   | intergenic variant | T            | C            | 6.60E-10 | 0.0107 |        |
| 3_41375107_T_A | <i>rs9877071</i>   | intron             | T            | A            | 1.10E-09 | 0.0112 | ULK4   |
| 3_41260017_G_A | <i>rs13075993</i>  | intron             | G            | A            | 1.30E-09 | 0.0104 | CTNNB1 |
| 3_41287657_A_G | <i>rs11716602</i>  | downstream variant | A            | G            | 1.60E-09 | 0.0105 | ULK4   |
| 3_41308348_T_C | <i>rs11707955</i>  | intron             | T            | C            | 1.70E-09 | 0.0105 | ULK4   |
| 3_41283382_G_A | <i>rs11129895</i>  | downstream variant | G            | A            | 2.00E-09 | 0.0104 | ULK4   |
| 3_41254646_G_T | <i>rs2140090</i>   | intron             | G            | T            | 2.40E-09 | 0.0102 | CTNNB1 |
| 3_41276166_A_T | <i>rs3774371</i>   | intron             | A            | T            | 2.40E-09 | 0.0102 | CTNNB1 |
| 3_41277040_C_T | <i>rs11564465</i>  | intron             | C            | T            | 2.90E-09 | 0.0102 | CTNNB1 |
| 3_41284891_G_A | <i>rs9883839</i>   | downstream variant | G            | A            | 2.90E-09 | 0.0102 | ULK4   |
| 3_41250481_G_A | <i>rs6776881</i>   | intron             | G            | A            | 3.00E-09 | 0.0102 | CTNNB1 |
| 3_41259511_G_A | <i>rs4973927</i>   | intron             | G            | A            | 3.00E-09 | 0.0102 | CTNNB1 |
| 3_41274072_C_G | <i>rs11564450</i>  | intron             | C            | G            | 3.20E-09 | 0.0101 | CTNNB1 |
| 3_41260369_C_T | <i>rs111353008</i> | intron             | C            | T            | 3.50E-09 | 0.0101 | CTNNB1 |
| 3_41287018_T_C | <i>rs11711946</i>  | downstream variant | T            | C            | 3.50E-09 | 0.0102 | ULK4   |
| 3_41274477_A_G | <i>rs11564454</i>  | intron             | A            | G            | 3.70E-09 | 0.0101 | CTNNB1 |
| 3_41284536_C_A | <i>rs9883073</i>   | downstream variant | C            | A            | 3.70E-09 | 0.0101 | ULK4   |
| 3_41377373_A_G | <i>rs901688</i>    | intron             | A            | G            | 3.80E-09 | 0.0104 | ULK4   |

|                |                   |                              |   |   |          |         |        |
|----------------|-------------------|------------------------------|---|---|----------|---------|--------|
| 3_41262444_T_C | <i>rs13072632</i> | intron                       | T | C | 4.00E-09 | 0.0101  | CTNNB1 |
| 3_41283793_G_C | <i>rs9311265</i>  | downstream<br>variant        | G | C | 4.20E-09 | 0.0101  | ULK4   |
| 3_41274270_A_T | <i>rs11564452</i> | intron                       | A | T | 4.90E-09 | 0.01    | CTNNB1 |
| 3_41231968_C_T | <i>rs9872276</i>  | upstream gene<br>variant     | C | T | 5.20E-09 | 0.0101  | CTNNB1 |
| 3_41272081_C_A | <i>rs1880481</i>  | intron                       | C | A | 5.20E-09 | 0.01    | CTNNB1 |
| 3_41371414_C_T | <i>rs6801474</i>  | intron                       | C | T | 5.20E-09 | 0.0124  | ULK4   |
| 3_41379517_T_C | <i>rs880603</i>   | intron                       | T | C | 5.30E-09 | 0.0103  | ULK4   |
| 3_41231784_T_A | <i>rs4974074</i>  | upstream gene<br>variant     | T | A | 5.80E-09 | 0.0101  | CTNNB1 |
| 3_41242863_A_G | <i>rs2371452</i>  | intron                       | A | G | 5.90E-09 | 0.01    | CTNNB1 |
| 3_41281388_T_G | <i>rs2953</i>     | 3' UTR                       | T | G | 6.10E-09 | 0.01    | CTNNB1 |
| 3_41374373_C_T | <i>rs7610589</i>  | intron                       | C | T | 6.30E-09 | 0.0124  | ULK4   |
| 3_41242338_C_A | <i>rs4533622</i>  | intron                       | C | A | 6.80E-09 | 0.0099  | CTNNB1 |
| 3_41243742_T_G | <i>rs3915129</i>  | intron                       | T | G | 6.90E-09 | 0.0099  | CTNNB1 |
| 3_41372090_C_T | <i>rs9820239</i>  | intron                       | C | T | 7.50E-09 | 0.0123  | ULK4   |
| 3_41295767_T_C | <i>rs11129896</i> | intron                       | T | C | 8.10E-09 | 0.0099  | ULK4   |
| 3_41236581_G_C | <i>rs9870255</i>  | intron                       | G | C | 8.20E-09 | 0.0099  | CTNNB1 |
| 3_41240177_G_A | <i>rs3864004</i>  | 5' UTR                       | G | A | 1.50E-08 | 0.01    | CTNNB1 |
| 3_41234516_C_G | <i>rs9859392</i>  | upstream gene<br>variant     | C | G | 1.70E-08 | 0.0097  | CTNNB1 |
| 3_41343854_T_G | <i>rs7637185</i>  | intron                       | T | G | 1.80E-08 | 0.0097  | ULK4   |
| 3_41261979_A_G | <i>rs1798802</i>  | intron                       | A | G | 3.70E-08 | -0.0094 | CTNNB1 |
| 3_41318158_C_T | <i>rs1949836</i>  | intron                       | C | T | 3.80E-08 | 0.0095  | ULK4   |
| 3_41215796_C_T | <i>rs9814976</i>  | regulatory region<br>variant | C | T | 4.20E-08 | 0.0094  |        |
| 3_41216266_C_A | <i>rs9815735</i>  | regulatory region<br>variant | C | A | 4.40E-08 | 0.0094  |        |

The BMI association signals of common variants with  $P\text{-value} < 5.0 \times 10^{-8}$  in *CTNNB1* and its adjacent loci from GIANT and UK Biobank GWAS (25) were shown. All results came from Type 2 Diabetes Knowledge Portal (T2D Portal) (<http://www.type2diabetesgenetics.org/>) and only variants which located on chromosome 3 between *41,136,351* and *41,381,986* were included.

**Table S2. Rare missense variants in the *CTNNB1* gene in young, severely obese cases and controls.**

| Position*  | Nucleotide Change <sup>†</sup> | Amino Acid Change <sup>†</sup> | State | Cases (1408) | Controls (1455) | BMI of cases (kg/m <sup>2</sup> ) | BMI of controls (kg/m <sup>2</sup> ) | SIFT      | PolyPhen2         | gnomAD (8624 EAS) | Transcriptional activity |
|------------|--------------------------------|--------------------------------|-------|--------------|-----------------|-----------------------------------|--------------------------------------|-----------|-------------------|-------------------|--------------------------|
| 3:41266178 | c.175A>G                       | p.Thr59Ala                     | Het   | 3            | 2               | 30.11, 39, 36.41                  | 22.04, 18.29                         | Tolerated | Benign            | 0                 | active                   |
| 3:41266230 | c.227A>C                       | p.Gln76Pro                     | Het   | 1            | 0               | 32.3                              | -                                    | Tolerated | Benign            | 0                 | -                        |
| 3:41266447 | c.244A>G                       | p.Ile82Val                     | Het   | 0            | 1               | -                                 | 19.69                                | Tolerated | Benign            | 0                 | -                        |
| 3:41266574 | c.371G>A                       | p.Arg124His                    | Het   | 1            | 0               | 30.85                             | -                                    | Damaging  | Possibly Damaging | 0                 | active                   |
| 3:41267237 | c.821G>A                       | p.Arg274His                    | Het   | 1            | 0               | 33.61                             | -                                    | Damaging  | Possibly Damaging | 0                 | active                   |
| 3:41275300 | c.1466A>G                      | p.Tyr489Cys                    | Het   | 2            | 0               | 36.4, 45.94                       | -                                    | Tolerated | Benign            | 6                 | -                        |
| 3:41279553 | c.2123G>A                      | p.Gly708Glu                    | Het   | 1            | 0               | 40.3                              | -                                    | Tolerated | Benign            | 0                 | active                   |
| 3:41280704 | c.2217G>A                      | p.Met739Ile                    | Het   | 1            | 0               | 30.2                              | -                                    | Tolerated | Benign            | 8                 | -                        |

\* NCBI Build 37. <sup>†</sup> Variations are based on RefSeq records NM\_001904.3 and NP\_001895.1. Homo, homozygous; Het, heterozygous. Functional prediction was conducted by SIFT (<https://sift.bii.a-star.edu.sg/>) (47) and PolyPhen2 (<http://genetics.bwh.harvard.edu/pph2/>) (48). EAS, East Asians

**Table S3. The clinical parameters related to obesity in gain-of-function *CTNNB1* carriers.**

|                           | Non-carrier Controls<br>Mean (95% CI) | Ob_1          | Ob_2          | Ob_3          | Ob_4          |
|---------------------------|---------------------------------------|---------------|---------------|---------------|---------------|
| <i>CTNNB1</i> Mutation    | Wild type                             | p.T59A        | p.T59A        | p.R124H       | p.R274H       |
| Age (years)               | 17.5 (17.4, 17.7)                     | 19.0          | 17.0          | 18.0          | 17.0          |
| <b>Obesity phenotypes</b> |                                       |               |               |               |               |
| Birth weight (g)          | 3398.4 (3322.5, 3474.3)               | 3150.0        | 2700.0        | 4000.0        | /             |
| BMI (kg/m <sup>2</sup> )  | 34.6 (34.1, 35.2)                     | 36.4          | 30.1          | 30.9          | 33.6          |
| VAT (cm <sup>2</sup> )    | 103.4 (92.6, 114.2)                   | <b>75.60*</b> | <b>85.90*</b> | <b>59.40*</b> | <b>73.50*</b> |
| SAT (cm <sup>2</sup> )    | 371.4 (344.3, 398.6)                  | 373.6         | 240.9         | 310.7         | 402.9         |
| TAT (cm <sup>2</sup> )    | 474.8 (442.5, 507.2)                  | 449.2         | 326.8         | 370.1         | 476.4         |
| Waist (cm)                | 104.6 (103.2, 106.0)                  | 107.5         | <b>93.2*</b>  | <b>93.5*</b>  | <b>104.0*</b> |
| Hip (cm)                  | 114.2 (113.1, 115.2)                  | 121.0         | 107.2         | 101.5         | 123.0         |
| WHR                       | 0.92 (0.91, 0.93)                     | <b>0.89*</b>  | <b>0.87*</b>  | 0.92          | <b>0.85*</b>  |
| <b>Liver enzymes</b>      |                                       |               |               |               |               |
| ALT (IU/L)                | 51.8 (44.5, 59.2)                     | <b>21.0*</b>  | <b>20.0*</b>  | <b>11.0*</b>  | <b>16.0*</b>  |
| AST (μIU/mL)              | 33.5 (29.6, 37.5)                     | <b>14.0*</b>  | <b>19.0*</b>  | <b>13.0*</b>  | <b>20.0*</b>  |
| GGT (μIU/mL)              | 28.7 (25.5, 31.9)                     | <b>19.0*</b>  | <b>16.0*</b>  | <b>12.0*</b>  | <b>16.0*</b>  |
| <b>Glucose parameters</b> |                                       |               |               |               |               |
| OGTT-BG0 (mmol/L)         | 5.00 (4.89, 5.89)                     | 4.75          | 4.70          | 4.80          | 5.10          |
| OGTT-BG120 (mmol/L)       | 7.72 (7.36, 8.09)                     | 6.30          | 9.30          | 6.80          | 6.10          |
| OGTT-INS0 (μIU/mL)        | 26.03 (24.21, 27.85)                  | 32.57         | 39.20         | 14.31         | 7.10          |
| OGTT-INS120 (μIU/mL)      | 174.90 (159.25, 190.57)               | 337.30        | 291.20        | 117.50        | 67.30         |
| HbA1c (%)                 | 5.72 (5.57, 5.87)                     | 5.40          | 5.10          | 5.80          | /             |
| Matsuda Index             | 33.37 (30.67, 36.07)                  | 18.73         | 14.49         | 45.18         | 75.97         |
| <b>Lipids profile</b>     |                                       |               |               |               |               |
| TG (mmol/L)               | 1.34 (1.33, 1.72)                     | 1.06          | 1.61          | 0.95          | 1.04          |
| TC (mmol/L)               | 4.34 (4.32, 4.53)                     | 4.29          | 5.56          | 3.22          | 4.24          |
| HDL-c (mmol/L)            | 1.10 (1.09, 1.22)                     | 1.11          | 1.14          | 0.96          | 1.00          |
| LDL-c (mmol/L)            | 2.75 (2.67, 2.84)                     | 2.54          | 3.82          | 2.16          | 2.95          |

224 age-, geography, nationality-matched young female subjects without *CTNNB1* mutations were recruited as the controls, in which 68 subjects received abdominal Computed Tomography (CT) scanning for the quantification of subcutaneous and visceral fat areas. Data for controls are means (95% confidential interval, 95% CI). \* Actual values of more than 3/4 mutant carriers are below 95% CI. BMI, body mass index. VAT, visceral adipose tissue areas. SAT, subcutaneous adipose tissue areas. TAT, total adipose tissues areas, equal to the sum of VAT plus SAT. WHR, waist-to-hip ratio. ALT, alanine aminotransferase. AST, aspartate aminotransferase. GGT, gamma glutamyl transpeptidase. OGTT, oral glucose tolerance test. BG0 and BG120, blood glucose levels at 0 and 120 minutes of OGTT. INS0 and INS120, plasma insulin levels at 0 and 120 minutes. Matsuda Index, a surrogate index of insulin sensitivity, was calculated as follows:  $\{10,000/[\text{fasting glucose} \times \text{fasting insulin} \times (\text{glucose}_{\text{mean}} \times \text{insulin}_{\text{mean}})]^{1/2}\}$ .
